# Supplementary material
Source: PubMed Central journal article supplement (PMC5210737)
Supplement: supp_pp.16.01365_PP2016-01365R1_Supplemental_Materialtbl.pdf [file supp_pp.16.01365_PP2016-01365R1_Supplemental_Materialtbl.pdf]

Table S1. Primer list for northern blot, nuclear run-on and PCR

Primers for Northern blot and run-on assays of LUC

LUC F TGACTGGCGACGTAATCCAC  
 LUC R GTACACGTTTCGTACATCTC

Primers for RT-PCR and real-time PCR of LUC

F0 (realtime F) GGGCGCGTTATTTATCGGAG  
 R0 (realtime R) CGGGAGGTAGATGAGATGTG  
 F1 GCGGAGGAGTTGTGTTTGTG  
 R1 CAATACGCAAACCGCCTCTC  
 R2 GGAGGTTTCCCGATATTACCC  
 R3 GGTCGGAGACGCTGTCAAC  
 R4 GGAACCCTAATTCCCTTATC

Primers for nuclear run-on, RT-PCR and real-time PCR of MULE-F19G14,

F1 (run-on and RT-PCR) CGAACCTTGGTCCGTGAAGG  
 R1 (run-on and RT-PCR) GTTCGTGGTTAAATCATTTCATG  
 F2 GTGGGCAATCACCTACTAT  
 R2 GAAACACTTTGACCTACCCAT  
 realtime F GGCTGCAGATTGCTGCCAAC  
 realtime R CAGATGATGAATGGGATGCG

Primers for RT-PCR, real-time PCR and run-on assays of ACTIN2

Actin2 F (run-on and RT-PCR) ATGGCTGAGGCTGATGATATTC  
 Actin2 R (run-on and RT-PCR) GATTGGCACAGTGTGAGACAC  
 Actin2-realtime-F GTGAAGGCTGGATTTGCAGG  
 Actin2-realtime-R GCTCAATAGGATACTTCAAGG

Primers for RT-PCR of UBC21, OTS1, OTS2, ULP1A, ULP1B, ULP2like1, ULP2like2 and NRPE1

UBC21 F ATGCAGGCAT CAAGAGCGCG  
 UBC21 R TCATCCTTTCTTAGGCATAG  
 OTS1 Seq F GCTTGGTGATTTCAGGGATG  
 OTS1 Seq R TCAATACCCTTCCACCACCG  
 OTS1(C526S) Seq F CAAGAAGCTCAGTGACGCTG  
 OTS1(C526S) Seq R TTACTCTGTCTGGTCACTGAC  
 OTS1 F ATGACGAAGAGGAAGAAGGAAG  
 OTS1 R TTACTCTGTCTGGTCACTGAC  
 OTS2 F ATGAAGAGACAAAGAGCAATCG  
 OTS2 R TTAATCTGTTTGGTTACCCTTG  
 ULP1B F ATGGCTCTTGTACCCAAGAT  
 ULP1B R TTAGTCAGCTCGCAGTCTCAG  
 ULP1A F ATGAAAAACC AATCTAGGGT  
 ULP1A R TCACTCGGCTTTCAGTTGCAG  
 ULP2like1 F ATGACTCTCC GGTCAAGTCA  
 ULP2like1 R TCAAGTTTTTGGCTTGGCCATC  
 ULP2like2 F ATGAAGAAAA ACTTTGAAGT  
 ULP2like2 R CTATTTCTCCATCTCCTCAGC  
 NRPD1 F ATGGAAGACG ATTGTGAGGA

NRPD1 R

TCACGGGTTTTTCGGAGAAACC

Table S2. Primers Used for Plasmid Construction.

pCambia3300-OTS1genomic-BamHI-F

actGGATCCggtaattgcttaattgaccaac

pCambia3300-OTS1genomic-HindIII-R

actAAGCTTtctgtcaaattggattagtg

OTS1(C526S)-F

CGATTTTGATTCTGGTCCGTTTGTGCTCTTC

OTS1(C526S)-R

GAAGAGCACAAACGGACCAGAATCAAAATCG
